# Supplementary material
Source: MDPI journal article supplement (https://www.mdpi.com/2379-139X/9/2/58)
Supplement: s1 [file s1]

# Supplementary Materials:

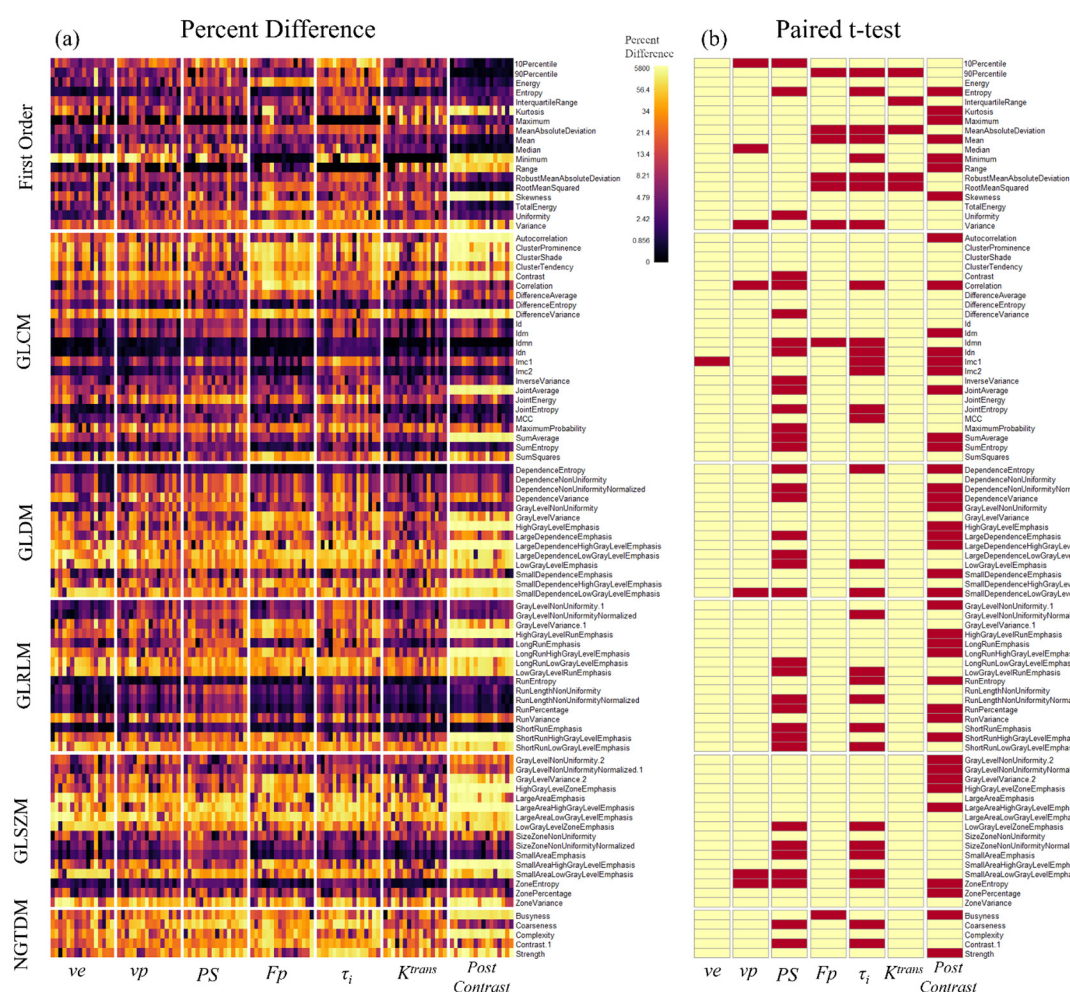

**Figure S1.** Percent difference and significance between features from isotropic and anisotropic (slice thickness 0.234 mm) images. (a) Heatmap depicting percent difference in histogram and texture features between isotropic parameter maps and up-sampled anisotropic maps (slice thickness 0.234 mm in axial direction). (b) Heatmap showing the features that have significant difference in radiomics features ( $p < 0.00054$ , depicted in red) between isotropic vs anisotropic image resolution, which are over 19.8% of all features.

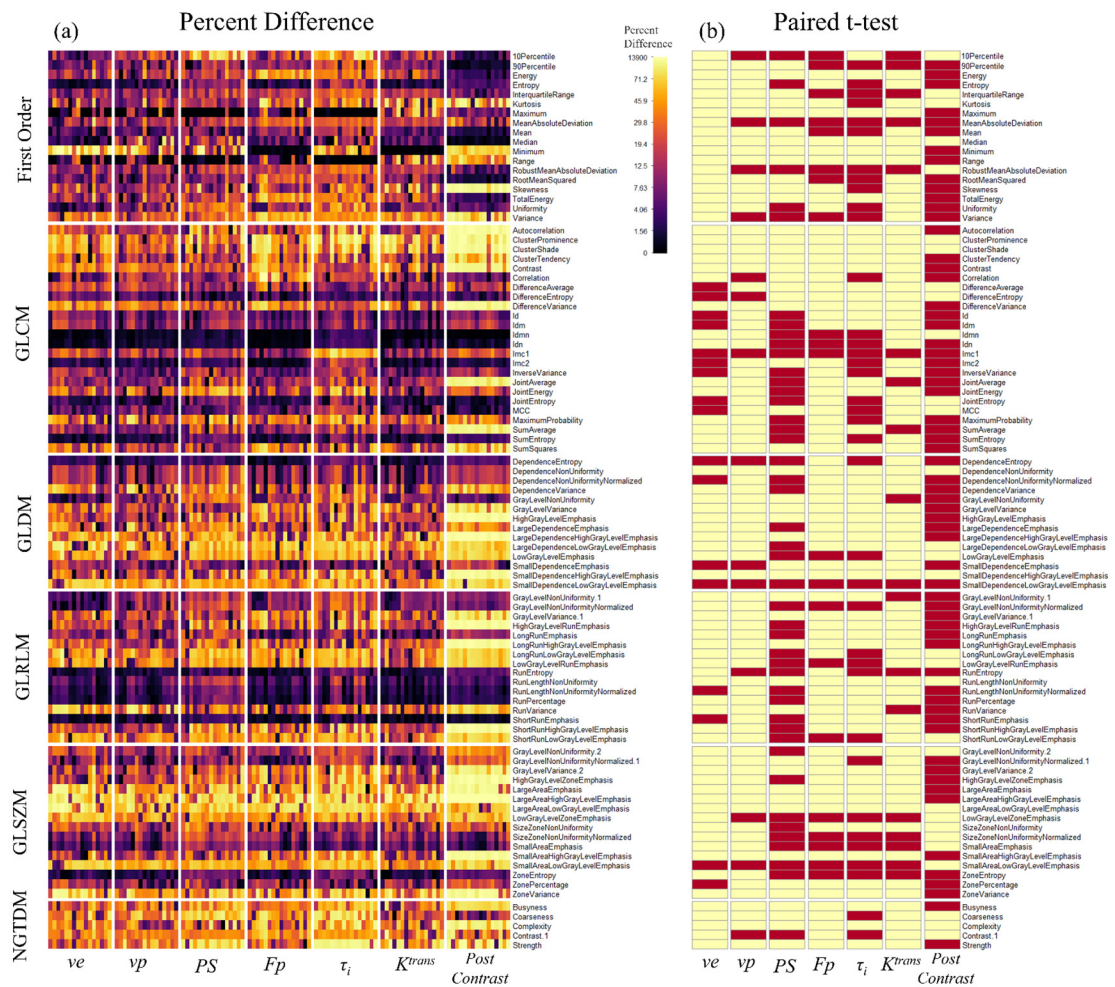

**Figure S2.** Percent difference and significance between features from isotropic and anisotropic (slice thickness 0.546 mm) images. (a) Heatmap depicting percent difference in histogram and texture features between isotropic parameter maps and up-sampled anisotropic maps (slice thickness 0.546 mm in axial direction). (b) Heatmap showing the features that have significant difference in radiomics features ( $p < 0.00054$ , depicted in red) between isotropic vs anisotropic image resolution, which are over 33.0% of all features.

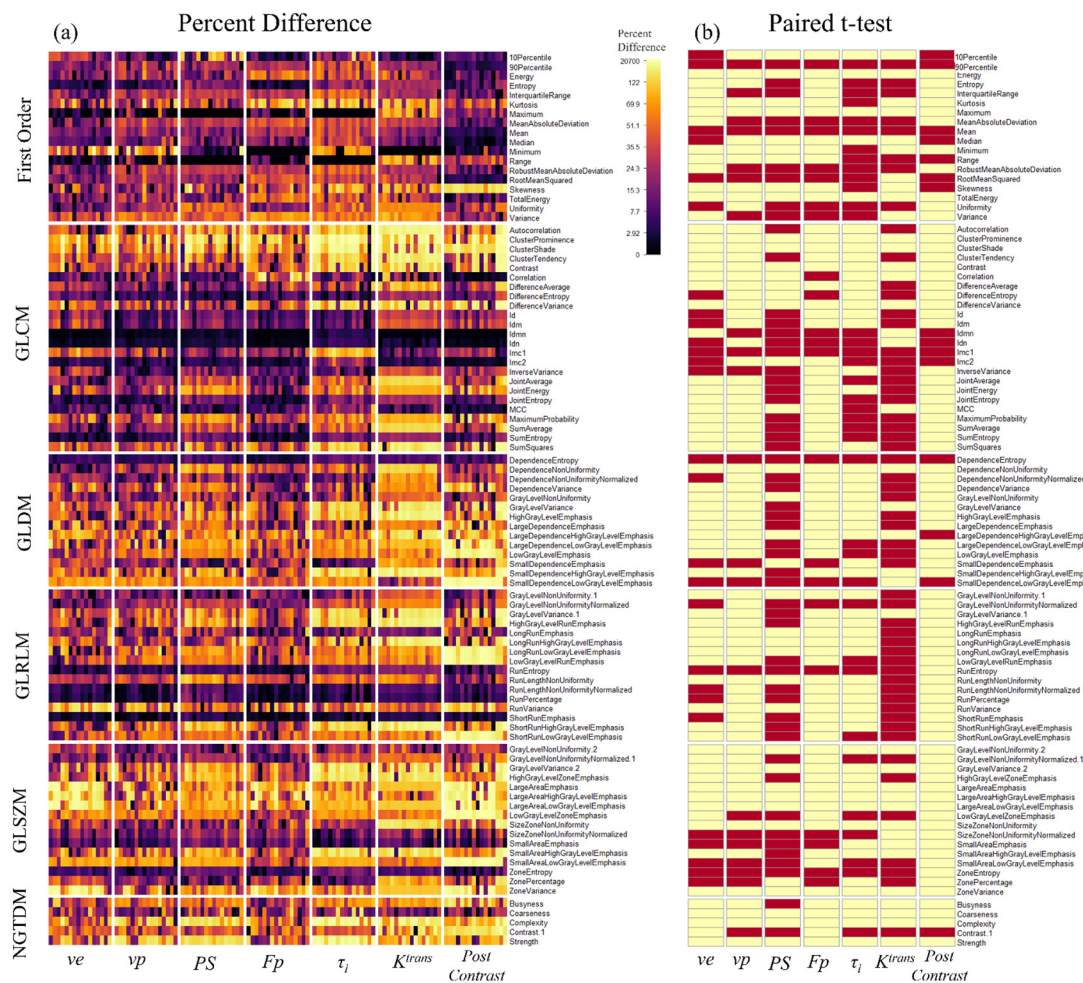

**Figure S3.** Percent difference and significance between features from isotropic and anisotropic (slice thickness 1.014 mm in coronal direction) images. (a) Heatmap depicting percent difference in histogram and texture features between isotropic parameter maps and up-sampled anisotropic maps (slice thickness 1.014 mm in coronal direction). (b) Heatmap showing the features that have significant difference in radiomics features ( $p < 0.00054$ , depicted in red) between isotropic vs anisotropic image resolution, which are over 35.3% of all features.



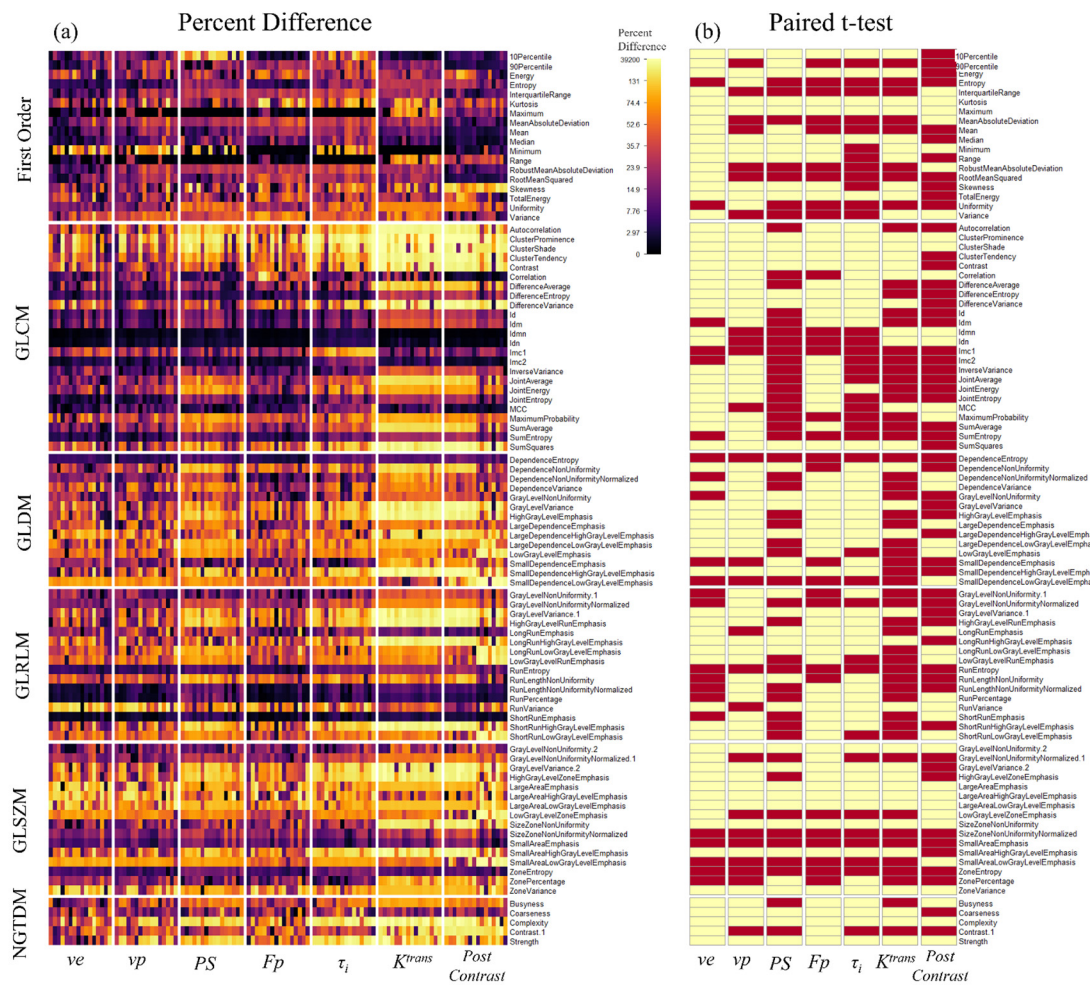

**Figure S4.** Percent difference and significance between features from isotropic and anisotropic (slice thickness 1.014 mm in sagittal direction) images. (a) Heatmap depicting percent difference in histogram and texture features between isotropic parameter maps and up-sampled anisotropic maps (slice thickness 1.014 mm in sagittal direction). (b) Heatmap showing the features that have significant difference in radiomics features ( $p < 0.00054$ , depicted in red) between isotropic vs anisotropic image resolution, which are over 42.1% of all features.
